# Supplementary material
Source: PubMed Central journal article supplement (PMC6342021)
Supplement: NIHMS977239-supplement-2.pdf [file NIHMS977239-supplement-2.pdf]

Table S1

| Drivers                     | Strategy (n's)   |             |     | Cell body location |    |     |    |     |       |     | Projections |     |     |          |         |         |     |       |       |       |     |     |        |     |     |     |     |     |
|-----------------------------|------------------|-------------|-----|--------------------|----|-----|----|-----|-------|-----|-------------|-----|-----|----------|---------|---------|-----|-------|-------|-------|-----|-----|--------|-----|-----|-----|-----|-----|
|                             | I                | II          | III | SNC                | RR | VTA | IF | CLi | DR/PG | CPr | CPi         | CPc | CPT | ACB core | ACB msh | ACB lsh | OT  | CEA c | CEA m | CEA l | BLA | IA  | BST ov | LS  | PFC | ENT |     |     |
| Dat-ires-Cre <sup>1</sup>   | 3                |             |     | ✓                  | ✓  | ✓   | ✓  | ✓   | ✓     | +   | +           | +   | +   | +        | +       | +       | +   | +     | +     | +     | +   | +   | +      | +   | +   | +   | +   |     |
|                             |                  | 2 (SNC/VTA) |     | ✓                  | □  | ✓   | ✓  | □   | □     | +   | +           | +   | +   | +        | +       | +       | +   | +     | +     | +/-   | +/- | +/- | +/-    | +/- | +/- | +/- | +/- | +/- |
|                             |                  |             | 2   | ✓                  | ✓  | ✓   | ✓  | ✓   | ✓     | +   | +           | +   | +   | +        | +       | +       | +   | +     | +     | +     | +   | +   | +      | +   | #   | #   | +   |     |
| Aldh1a1-CreERT <sup>2</sup> | 2                |             |     | ✓                  | □  | ✓   | ✓  | ✓   | □     | +   | +           | +   | +/- | -        | +       | +/-     | +/- | -     | -     | -     | -   | -   | -      | -   | +   | -   | -   |     |
|                             |                  | 6 (SNC)     |     | ✓                  | □  | □   | □  | □   | □     | +   | +           | +   | +/- | -        | -       | -       | -   | -     | -     | -     | -   | -   | -      | -   | -   | -   | -   |     |
|                             |                  | 6 (VTA)     |     | □                  | □  | ✓   | ✓  | ✓   | □     | -   | -           | -   | -   | -        | +       | +/-     | +/- | -     | -     | -     | -   | -   | -      | -   | +   | -   | -   |     |
|                             |                  |             | 3   | ✓                  | □  | ✓   | ✓  | ✓   | □     | +   | +           | +   | +/- | -        | +       | +/-     | +/- | -     | -     | -     | -   | -   | -      | -   | +   | -   | -   |     |
| Adcyap1-Cre <sup>2</sup>    | 3 (Frepe)        |             |     | ✓                  | ✓  | ✓   | ✓  | ✓   | □     | #   | #           | #   | #   | #        | #       | #       | #   | #     | #     | #     | #   | #   | #      | #   | #   | #   | #   |     |
|                             |                  | 3 (VTA)     |     | □                  | □  | ✓   | ✓  | ✓   | □     | -   | -           | -   | -   | +/-      | +       | +/-     | +/- | -     | -     | -     | +/- | -   | -      | +   | +/- | +/- | +/- |     |
| Calb1-Cre                   |                  | 3 (SNC)     |     | ✓                  | □  | ✓   | □  | □   | □     | +   | +           | +   | +   | +/-      | -       | -       | -   | +/-   | -     | -     | +/- | +/- | -      | -   | +/- | +/- | +/- |     |
|                             |                  |             | 3   | ✓                  | ✓  | ✓   | ✓  | ✓   | ✓     | +   | +           | +   | +   | +/-      | +/-     | +/-     | +/- | +/-   | -     | +/-   | +/- | +/- | -      | -   | -   | -   | -   |     |
| Cck-Cre <sup>3</sup>        | 2 (Frepe & Ai65) |             |     | ✓                  | □  | ✓   | ✓  | ✓   | ✓     | #   | #           | #   | #   | #        | #       | #       | #   | #     | #     | #     | #   | #   | #      | #   | #   | #   | #   |     |
|                             |                  | 2 (VTA)     |     | □                  | □  | ✓   | ✓  | □   | □     | +   | +/-         | -   | -   | +        | +       | +       | +   | -     | -     | -     | +   | -   | -      | +   | +   | +   | +   |     |
| Ndnf-dgCre <sup>4</sup>     | 3                |             |     | ✓                  | ✓  | ✓   | □  | □   | □     | #   | #           | #   | #   | #        | #       | #       | #   | #     | #     | #     | #   | #   | #      | #   | #   | #   | #   |     |
|                             |                  |             | 3   | ✓                  | ✓  | ✓   | □  | □   | □     | +   | +           | +   | +/- | +        | -       | +/-     | -   | -     | -     | -     | -   | -   | -      | -   | -   | -   | -   |     |
| Sox6-FSF-Cre                | 5 (Frepe)        |             |     | ✓                  | ✓  | ✓   | □  | □   | □     | #   | #           | #   | #   | #        | #       | #       | #   | #     | #     | #     | #   | #   | #      | #   | #   | #   | #   |     |
|                             |                  | 2 (VTA/SNC) |     | ✓                  | □  | ✓   | □  | □   | □     | +   | +           | +/- | -   | +        | -       | +       | +/- | -     | -     | -     | -   | -   | -      | -   | -   | -   | -   |     |
|                             |                  | 2 (SNC)     |     | ✓                  | □  | □   | □  | □   | □     | +   | +           | +   | +/- | +/-      | -       | +/-     | +/- | -     | -     | -     | -   | -   | -      | -   | -   | -   | -   |     |
| Vglut2-Cre <sup>5</sup>     | 3 (Frepe)        |             |     | ✓                  | ✓  | ✓   | ✓  | ✓   | ✓     | #   | #           | #   | #   | #        | #       | #       | #   | #     | #     | #     | #   | #   | #      | #   | #   | #   | #   |     |
|                             |                  | 5 (VTA)     |     | □                  | □  | ✓   | ✓  | □   | □     | -   | -           | -   | -   | +/-      | +       | +/-     | +   | -     | -     | -     | +   | -   | -      | +   | +/- | +/- | +/- |     |
|                             |                  | 3 (SNC)     |     | ✓                  | □  | □   | □  | □   | □     | -   | +/-         | +/- | +   | -        | -       | -       | -   | +     | -     | -     | -   | -   | -      | -   | -   | -   | -   |     |
| Vip-Cre <sup>3</sup>        | 3                |             |     | □                  | □  | □   | □  | □   | ✓     | -   | -           | -   | -   | -        | -       | -       | -   | -     | +/-   | +     | -   | -   | +      | -   | -   | -   |     |     |
|                             |                  |             | 3   | □                  | □  | □   | □  | □   | ✓     | -   | -           | -   | -   | -        | -       | -       | -   | -     | +/-   | +     | -   | -   | +      | -   | -   | -   |     |     |

n = the number of mice used in independent experiment.

+ = dense projections; +/- = fibers present; - = fibers absent; # = not analyzed due to recombination outside midbrain; ## = not analyzed due to the lack of recombination.

#### References

- Bäckman, C. M., Malik, N., Zhang, Y., Shan, L., Grinberg, A., Hoffer, B. J., et al. (2006). Characterization of a mouse strain expressing Cre recombinase from the 3' untranslated region of the dopamine transporter locus. *Genesis (New York, NY : 2000)*, 44(8), 383–390.
- Krashes, M. J., Shah, B. P., Madara, J. C., Olson, D. P., Strohlic, D. E., Garfield, A. S., et al. (2014). An excitatory paraventricular nucleus to AgRP neuron circuit that drives hunger. *Nature*, 507(7491), 238–242.
- Taniguchi, H., He, M., Wu, P., Kim, S., Paik, R., Sugino, K., et al. (2011). A resource of cre driver lines for genetic targeting of GABAergic neurons in cerebral cortex. *Neuron*, 71(6), 995–1013.
- Tasic, B., Menon, V., Nguyen, T. N., Kim, T. K., Jarsky, T., Yao, Z., et al. (2016). Adult mouse cortical cell taxonomy revealed by single cell transcriptomics. *Nature Neuroscience*, 19(2), 335–346.
- Vong, L., Ye, C., Yang, Z., Choi, B., Chua, S., & Lowell, B. B. (2011). Leptin action on GABAergic neurons prevents obesity and reduces inhibitory tone to POMC neurons. *Neuron*, 71(1), 142–154.

**Table S2**

| <b>DA neuron subtypes</b>   | <b>Preferred Strategy</b>            | <b>Mouse drivers</b>                        |
|-----------------------------|--------------------------------------|---------------------------------------------|
| <b>Aldh1a1+/Sox6+ (SNc)</b> | Viral injection (CreON,FlpON) in SNc | Aldh1a1-CreER <sup>T2</sup> ;<br>Th-2A-Flpo |
| <b>Calb1+/Sox6+ (SNc)</b>   | Viral injection (CreON,FlpON) in SNc | Calb1-Cre; Th-2A-<br>Flpo                   |
| <b>Vglut2+ (SNc)</b>        | Viral injection (CreON,FlpON) in SNc | Vglut2-Cre; Th-2A-<br>Flpo                  |
| <b>Sox6+/Calb1+ (VTA)</b>   | Viral injection (CreON,FlpON) in VTA | Sox6-FSF-Cre;<br>Th-2A-Flpo                 |
| <b>Vglut2+/Otx2+ (VTA)</b>  | Viral injection (CreON,FlpON) in VTA | Vglut2-Cre; Th-2A-<br>Flpo                  |
| <b>Aldh1a1+/Otx2+ (VTA)</b> | Viral injection (CreON,FlpON) in VTA | Aldh1a1-CreER <sup>T2</sup> ;<br>Th-2A-Flpo |
| <b>Vip+ (DR/PAG)</b>        | Transgenic reporter (e.g. Ai65)      | Vip-Cre; Th-2A-Flpo                         |
